# Supplementary material for: Local Release of TGF‐β Inhibitor Modulates Tumor‐Associated Neutrophils and Enhances Pancreatic Cancer Response to Combined Irreversible Electroporation and Immunotherapy
Source: Adv Sci (Weinh). 2022 Feb 7;9(10):2105240. doi: 10.1002/advs.202105240 (PMC8981446; doi:10.1002/advs.202105240)
Supplement: Supplementary file 1 — Supporting Information [file ADVS-9-2105240-s001.pdf]

## Supporting Information

for *Adv. Sci.*, DOI 10.1002/adv.202105240

Local Release of TGF- $\beta$  Inhibitor Modulates Tumor-Associated Neutrophils and Enhances Pancreatic Cancer Response to Combined Irreversible Electroporation and Immunotherapy

*Huiming Peng, Jian Shen, Xin Long, Xiaoqi Zhou, Jiaqi Zhang, Xina Xu, Teng Huang, Hui Xu, Shuguo Sun, Chun Li, Ping Lei\*, Heshui Wu\* and Jun Zhao\**

## Supporting Information

for *Adv. Sci.*, DOI: 10.1002/advs.202105240

Local Release of TGF- $\beta$  Inhibitor Modulates  
Tumor-Associated Neutrophils and Enhances Pancreatic  
Cancer Response to Combined Irreversible Electroporation  
and Immunotherapy

*Huiming Peng, Jian Shen, Xin Long, Xiaoqi Zhou, Jiaqi Zhang, Xina Xu, Teng Huang, Hui Xu,  
Shuguo Sun, Chun Li, Ping Lei\*, Heshui Wu\*, and Jun Zhao\**

## **Supporting Information for**

Local Release of TGF- $\beta$  Inhibitor Modulates Tumor-Associated Neutrophils and Enhances  
Pancreatic Cancer Response to Combined Irreversible Electroporation and Immunotherapy

*Huiming Peng, Jian Shen, Xin Long, Xiaoqi Zhou, Jiaqi Zhang, Xina Xu, Teng Huang, Hui Xu,  
Shuguo Sun, Chun Li, Ping Lei\*, Heshui Wu\*, Jun Zhao\**

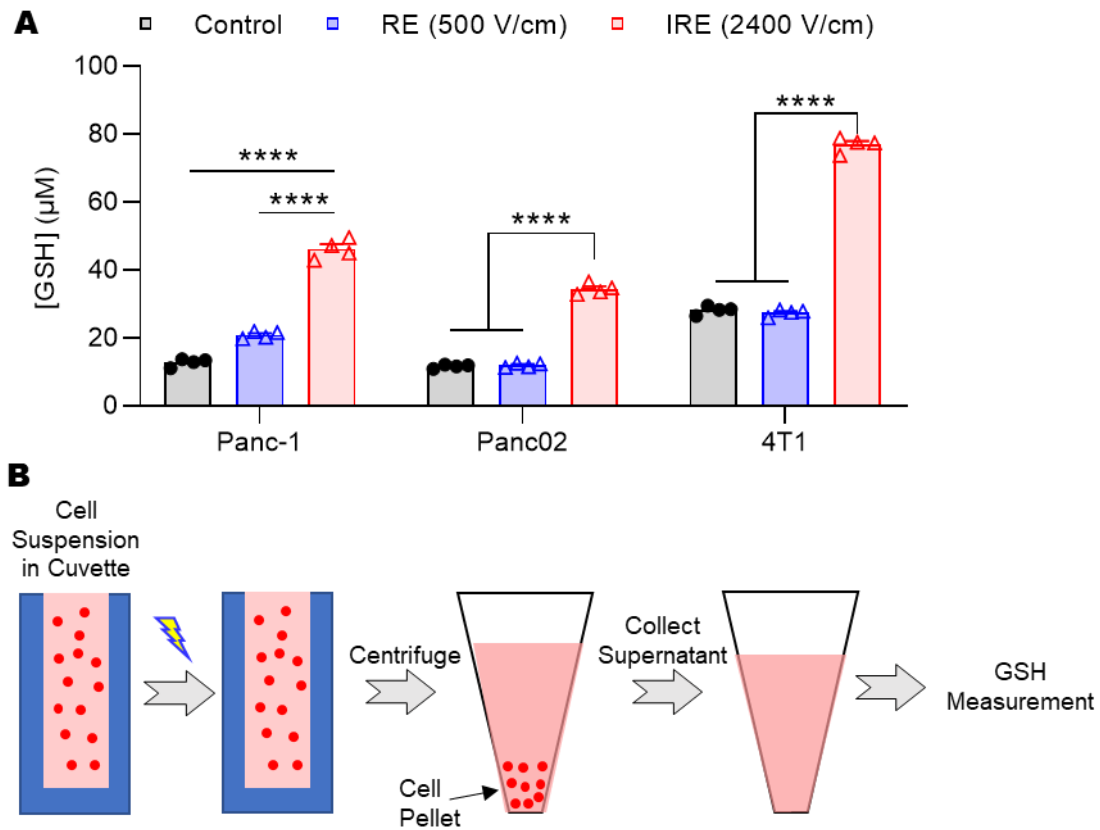

**Figure S1.** IRE induced release of glutathione (GSH). A) GSH concentration in cell supernatant after IRE treatment of Panc-1 human pancreatic cancer cells, Pan02 murine pancreatic cancer cells, and 4T1 murine breast cancer cells. B) Schemes of experiment flow. Cells were suspended in phosphate buffered saline (PBS) at  $2 \times 10^6/\text{mL}$ , and subjected to electroporation at 0 (control), 500 V/cm (reversible electroporation, RE), or 2400 V/cm (IRE). Other parameters for electroporation: pulse duration = 100  $\mu\text{second}$ , pulse interval = 1 second, pulse number = 20. The supernatant of cell suspension was collected, GSH concentration measured with Ellman's reagent. \*\*\* $p < 0.0001$ . Data are presented as mean  $\pm$  SEM of  $n = 4$  in bar graphs overlaid with individual data points. Significance was determined using one-way ANOVA followed by Tukey post hoc analysis. \*  $p < 0.05$ , \*\*  $p < 0.01$ , n.s. = not significant

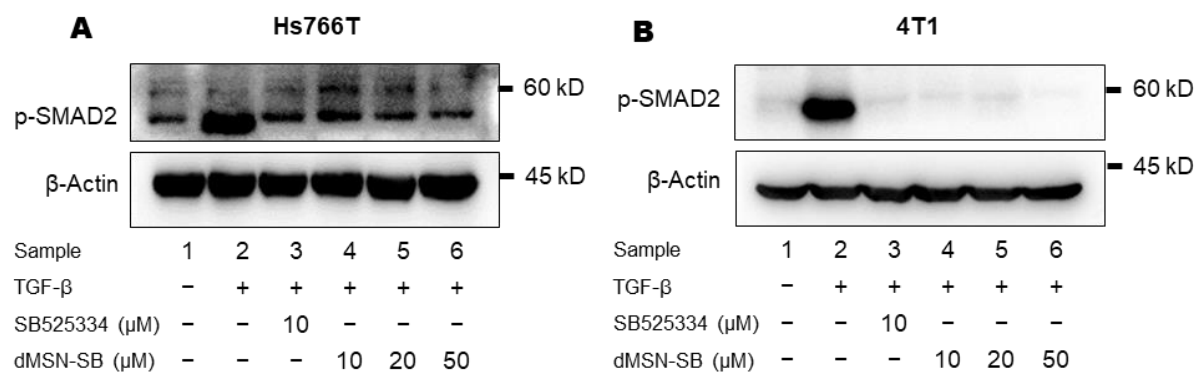

**Figure S2.** Expression of p-SMAD2 in Hs766T human pancreatic cancer cell line (A) and 4T1 murine breast cancer cell line (B).

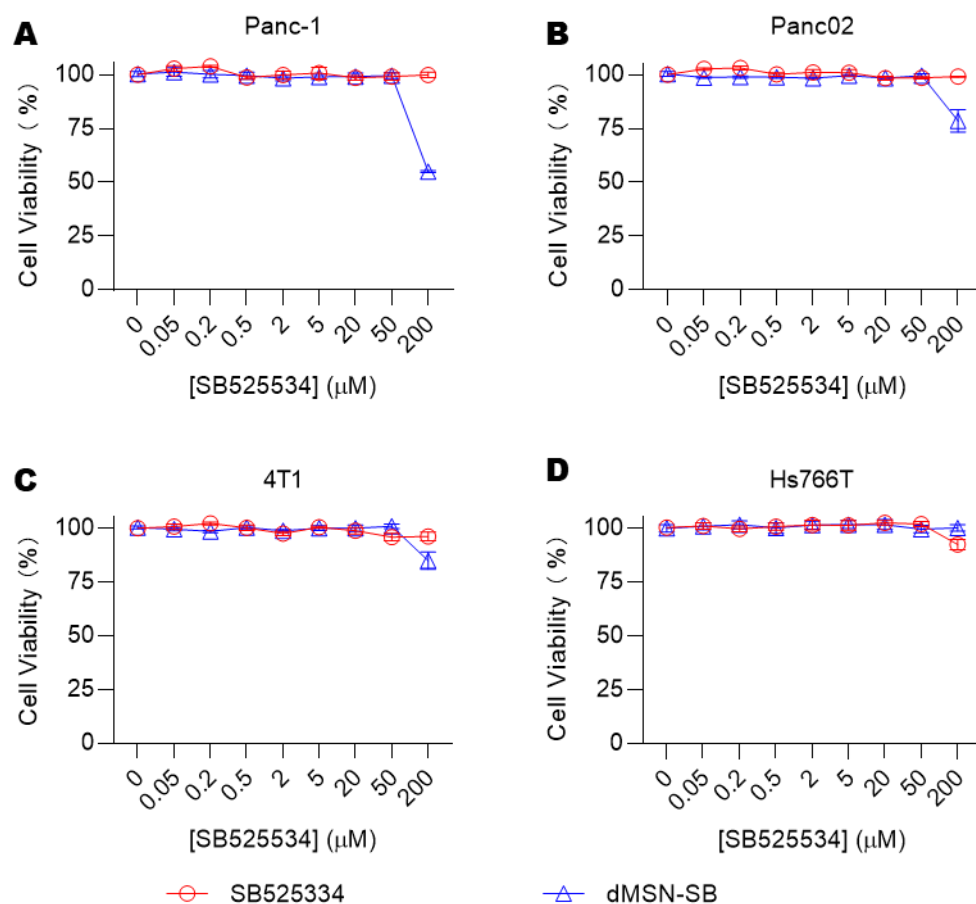

**Figure S3.** In vitro toxicity of dMSN-SB and SB525534. A) Panc-1 human pancreatic cancer cells; B) Panc02 murine pancreatic cancer cells; C) 4T1 murine breast cancer cells, and D) Hs766T human pancreatic cancer cells. Cells were incubated at 37 °C for 24 hours with dMSN-SB or SB525534 at concentrations equivalent to 0 to 200 μM of SB525534. Cell viability was measured using CCK-8 assay and normalized to that of untreated control. Data are shown as mean ± SEM,  $n = 6$ . Small error bars covered by the symbol are not shown.

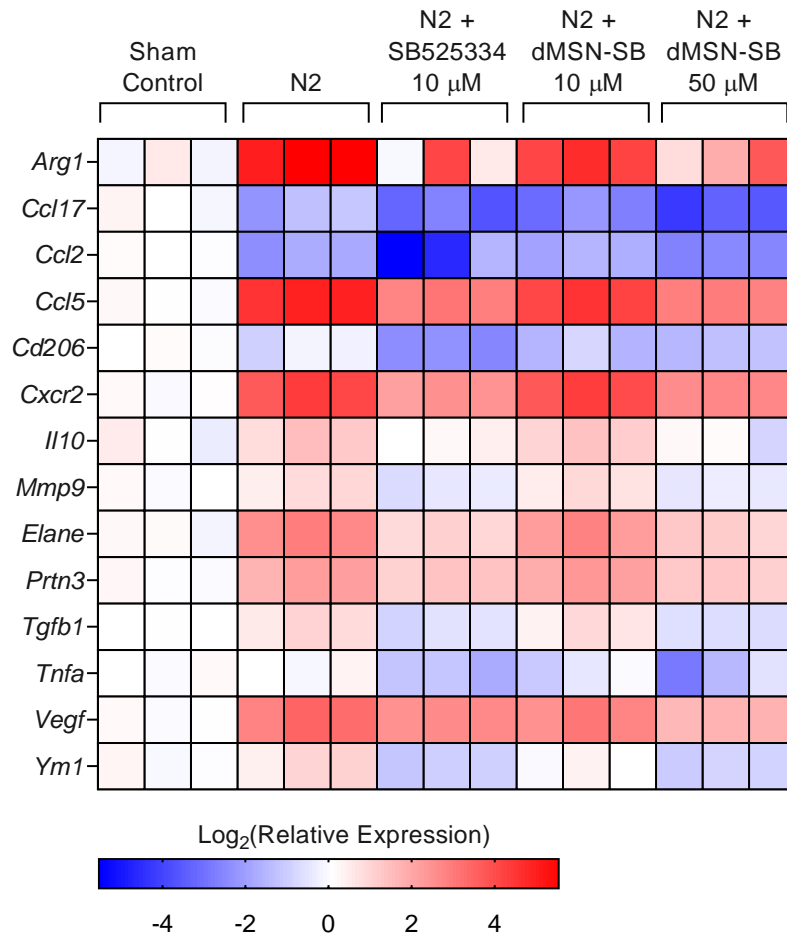

**Figure S4.** Relative expression of N2-associated genes in murine bone marrow-isolated neutrophils after treatment with N2 cocktail, SB525334 (10  $\mu$ M), dMSN-SB (10  $\mu$ M) and/or dMSN-SB (50  $\mu$ M). Cells were cultured for 24 hours before analyses. Data are shown as heat map with a colored scale. Each square represents an individual independent data point. Three replicates were included in each group.

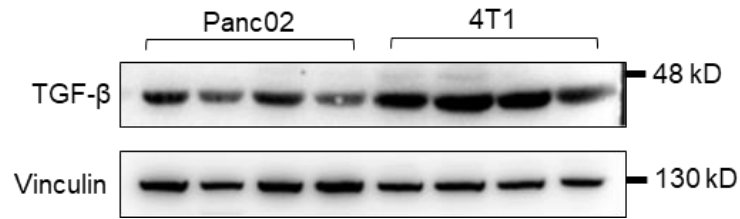

**Figure S5.** TGF- $\beta$  expression in Panc02 and 4T1 xenograft tumors. Vinculin was used as loading control. Four independent tumors were analyzed for each tumor type.

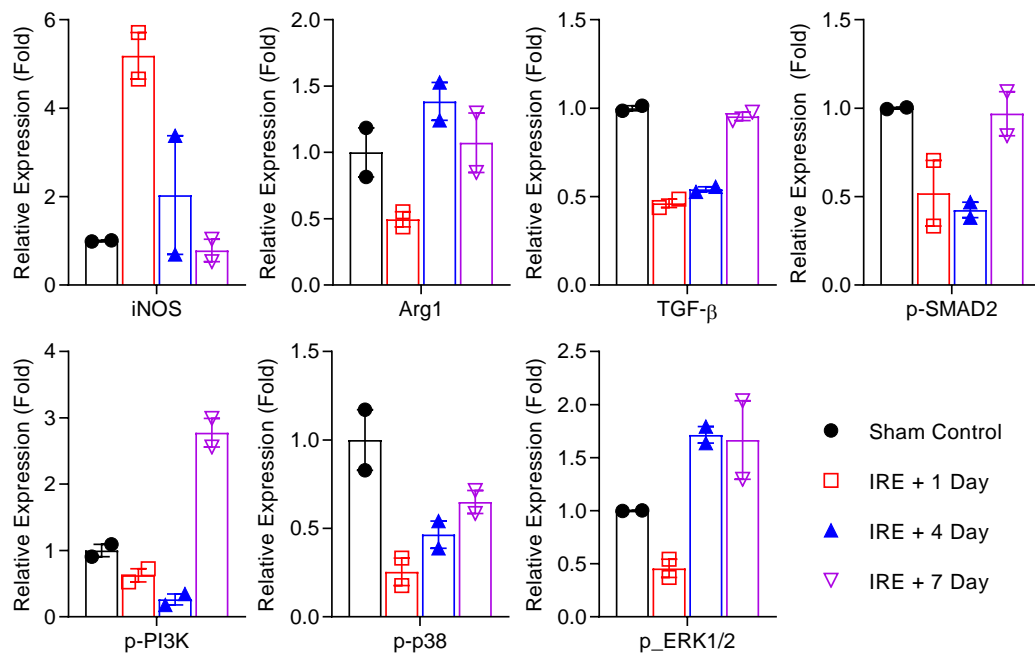

**Figure S6.** Quantification of immunoblots in Figure 2E. Signal intensity from each band was integrated and normalized to those of  $\beta$ -actin in sham control. Data are presented as mean  $\pm$  SEM of  $n = 2$  in bar graphs overlaid with individual data points

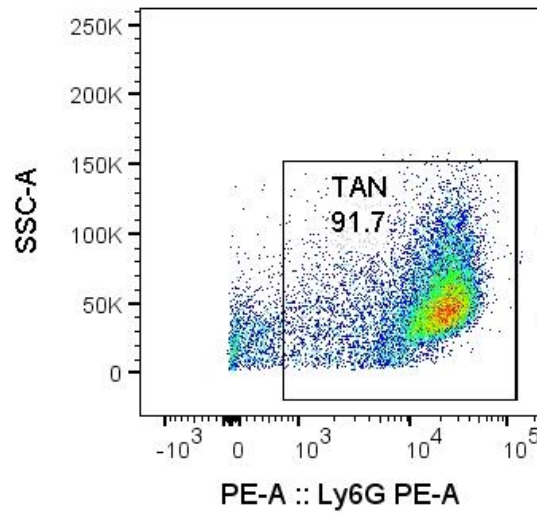

**Figure S7.** Flowcytometry analysis of TAN purity after magnetic activated cell sorting.

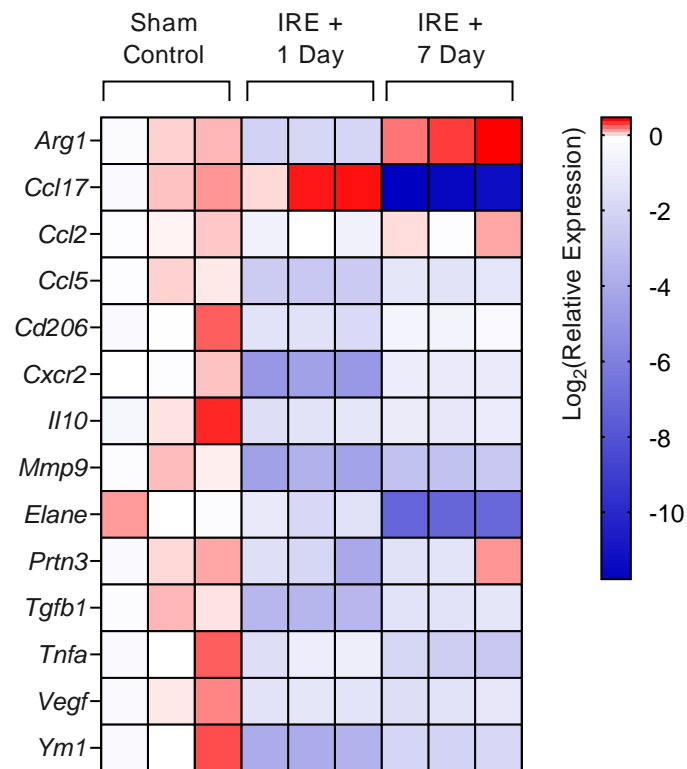

**Figure S8.** RT-PCR analyses of N2-associated genes in TANs isolated from Panc02 tumors post-IRE. Data are shown as heat map with a colored scale. Each square represents an individual independent data point. Three replicates were included in each group.

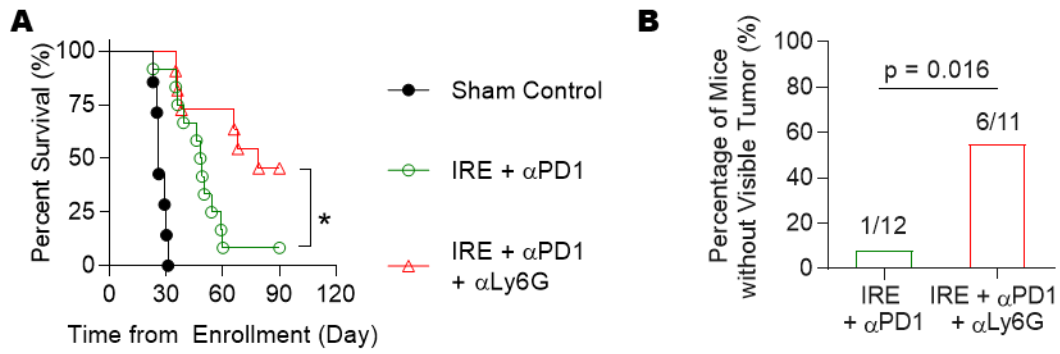

**Figure S9.** Effect of neutrophil depletion on the efficacy of IRE + αPD1 treatment in subcutaneous Panc02 model. A) Kaplan-Meier survival curves of sham control (black solid circle,  $n = 7$ ), IRE + αPD1 ( $n = 12$ ), and IRE + αPD1 + αLy6G ( $n = 11$ ). Survival difference in was evaluated using Log-rank test,  $*p < 0.05$ . B) Percentage comparison of mice without visible tumors on day 90 after enrollment. IRE + αPD1 (1 out of 12) or IRE + αPD1 + αLy6G (6 out of 11). Significance of difference was examined using  $\chi^2$  test.

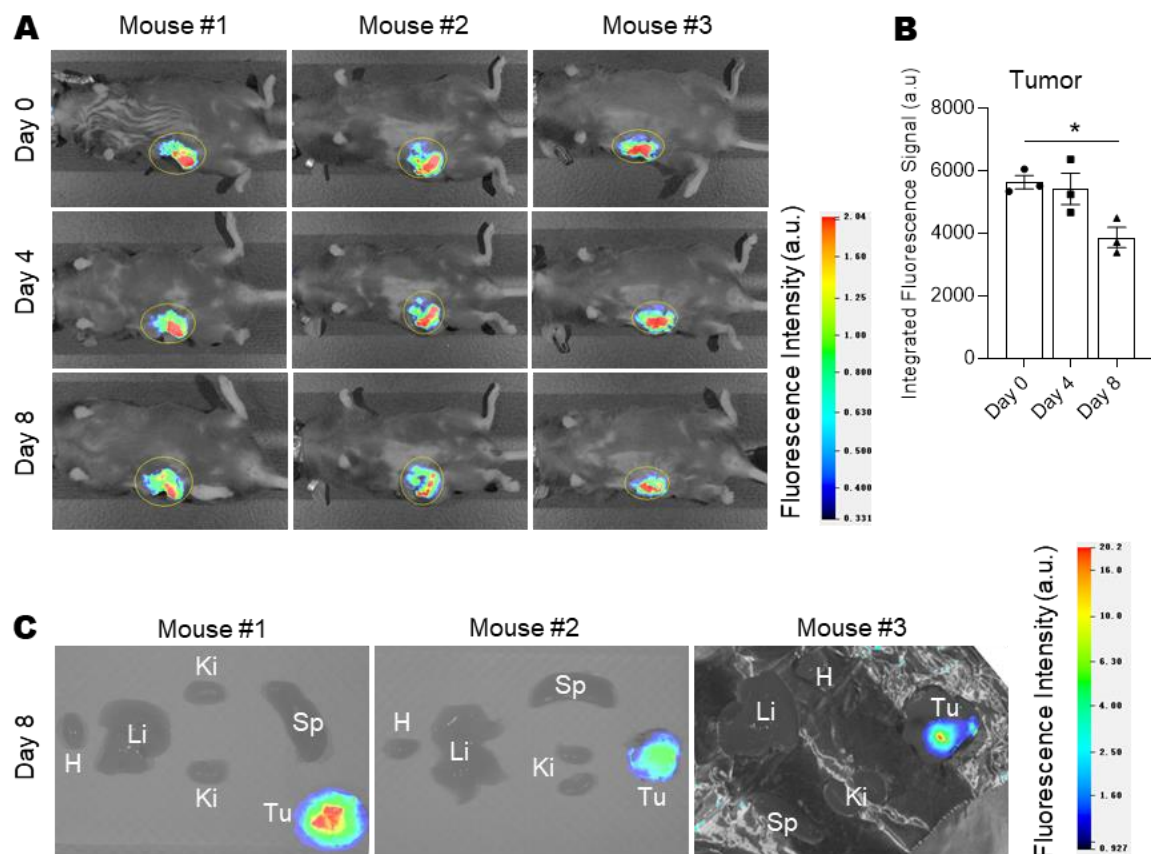

**Figure S10.** Fluorescence tracking of dMSN-SB after intratumoral injection. A) Whole body fluorescence imaging of Panc02 tumor at different time points after IRE. B) Quantification of integrated fluorescence signals of tumor regions. C) Fluorescence imaging of different organs on day 8 after IRE. Experimental procedure: Near-infrared fluorescence dye DiR was loaded during preparation of dMSN-SB, and the resultant formulation was intratumorally injected after IRE using the same dose for therapy studies. The mice were imaged on Pearl Trilogy Imaging System (Li-Cor Biosciences, NE, USA). Data are presented as mean  $\pm$  SEM in bar graphs overlaid with individual data points. Significance was determined using one-way ANOVA followed by Tukey post hoc analysis. \* $p < 0.05$ .

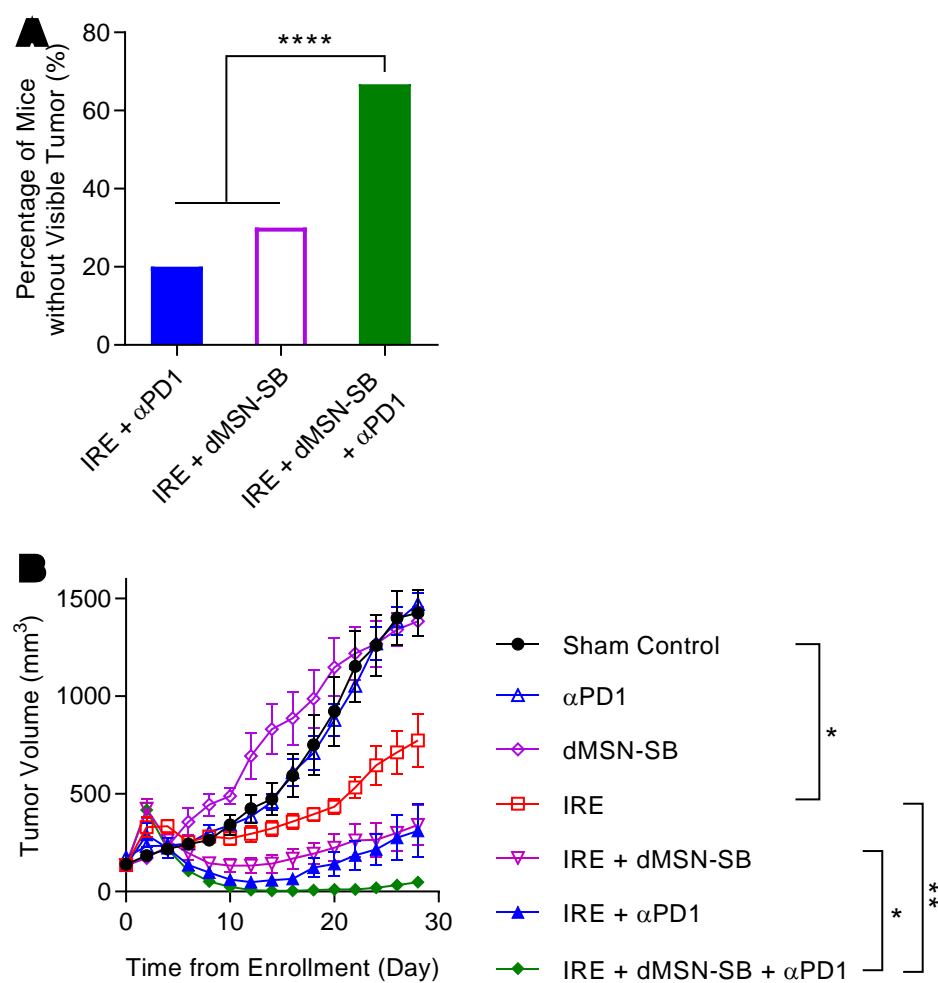

**Figure S11.** Anti-tumor efficacy in subcutaneous Panc02 model. A) Percentage comparison of mice without visible on day 90 after enrollment in groups of IRE +  $\alpha$ PD1 (20%), IRE + dMSN-SB (30%), and IRE + dMSN-SB +  $\alpha$ PD1 (67%). Significance of difference was examined using  $\chi^2$  test. B) Tumor growth curves up to 28 days after enrollment in groups of sham control ( $n = 5$ ), IRE ( $n = 5$ ), dMSN-SB ( $n = 7$ ),  $\alpha$ PD1 ( $n = 5$ ), IRE +  $\alpha$ PD1 ( $n = 5$ ), IRE + dMSN-SB ( $n = 10$ ), IRE + dMSN-SB +  $\alpha$ PD1 ( $n = 15$ ). Data are shown as mean  $\pm$  SEM in symbols. Significance of differences was determined using one-way ANOVA followed by Tukey post-hoc analysis. \* $p < 0.05$ , \*\* $p < 0.01$ .

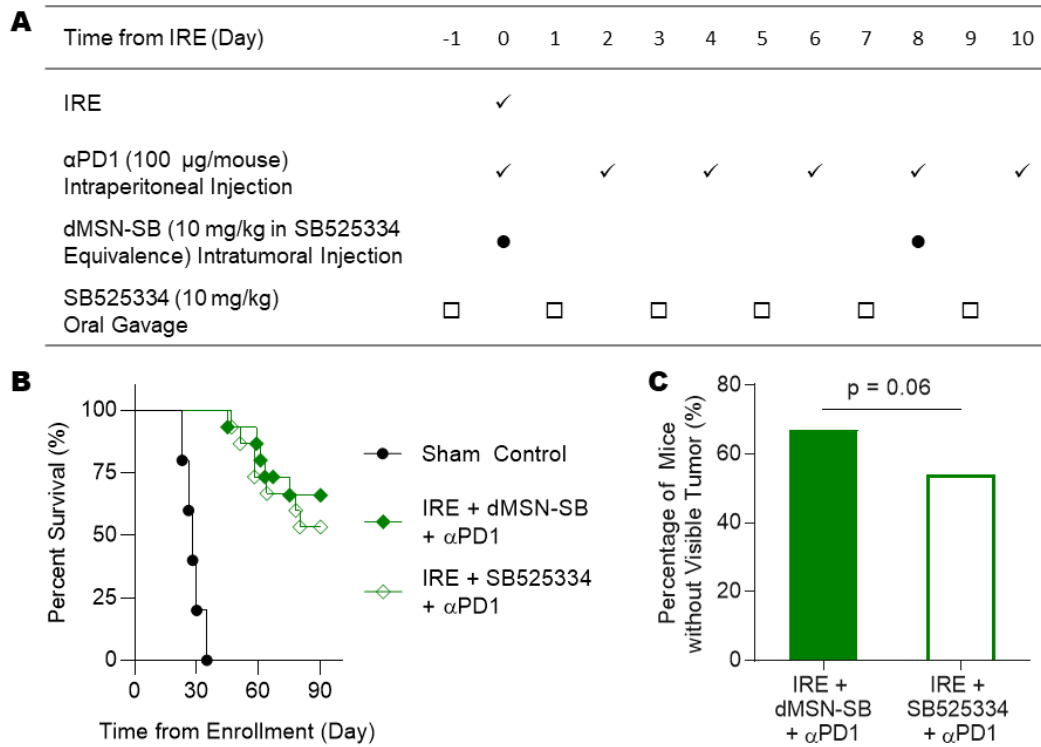

**Figure S12.** Comparison between dMSN-SB and unloaded SB525334 for enhancement of IRE +  $\alpha$ PD1 therapy. A) Treatment dosage, routes, and schedules for subcutaneous Panc02 tumor model. B) Kaplan-Meier survival curves of sham control ( $n = 5$ ), IRE + dMSN-SB +  $\alpha$ PD1 ( $n = 15$ ), and IRE + SB525334 ( $n = 15$ ). C) Percentage comparison of mice with no visible tumor on day 90,  $p = 0.06$ ,  $\chi^2$ -test.

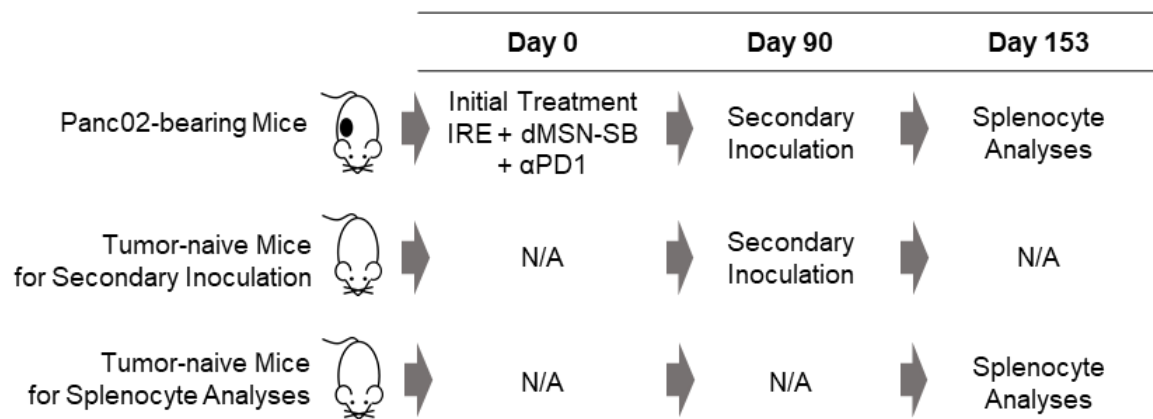

**Figure S13.** Timeline for re-challenge study and splenocyte analyses.

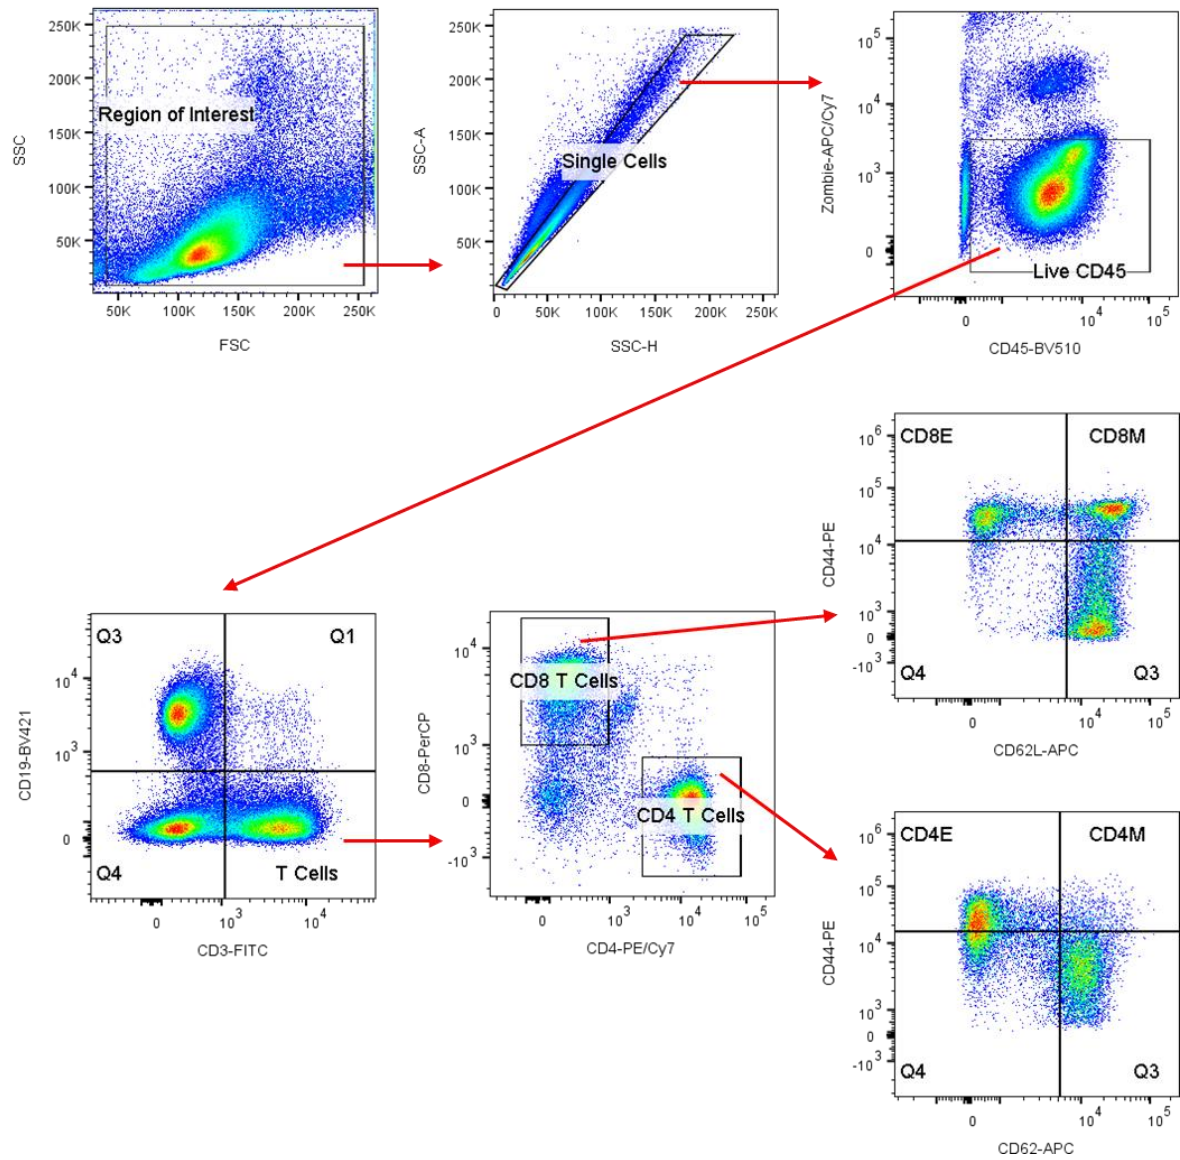

**Figure S14.** Gating strategy for memory splenocytes.

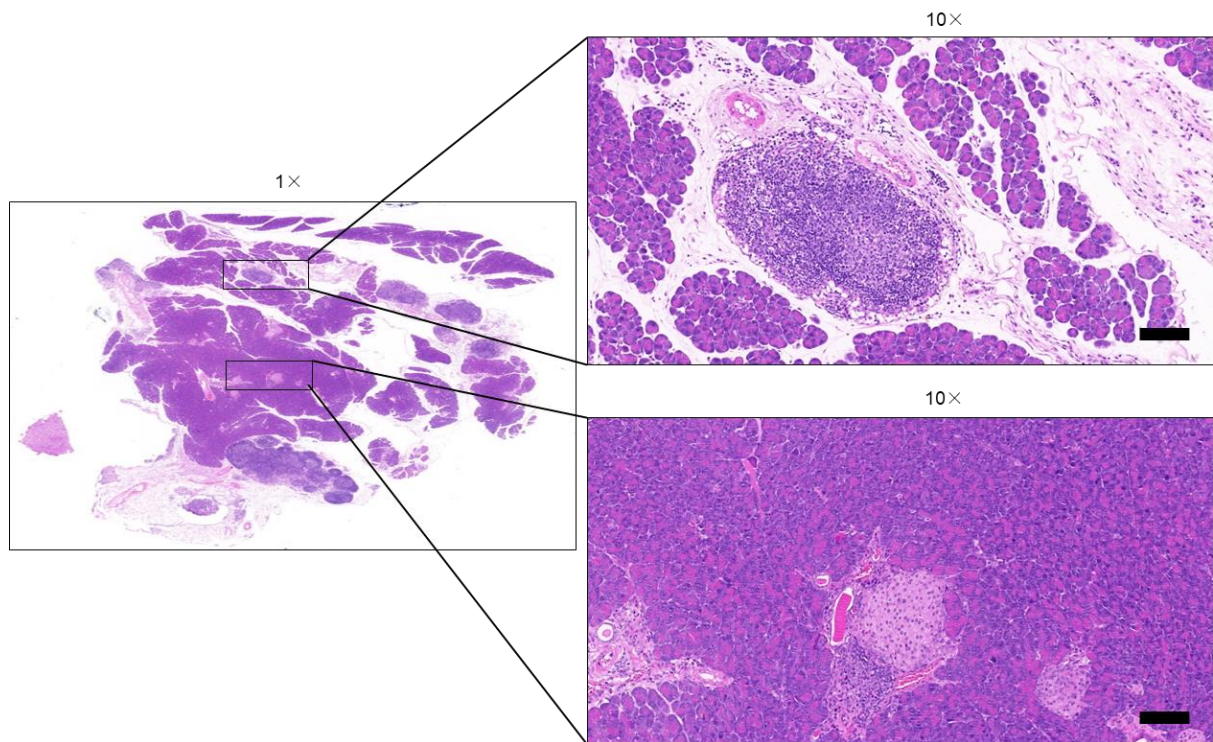

**Figure S15.** Representative H&E staining of tumor-free pancreas in cured orthotopic Panc02 model. Scale bar = 100 μm.

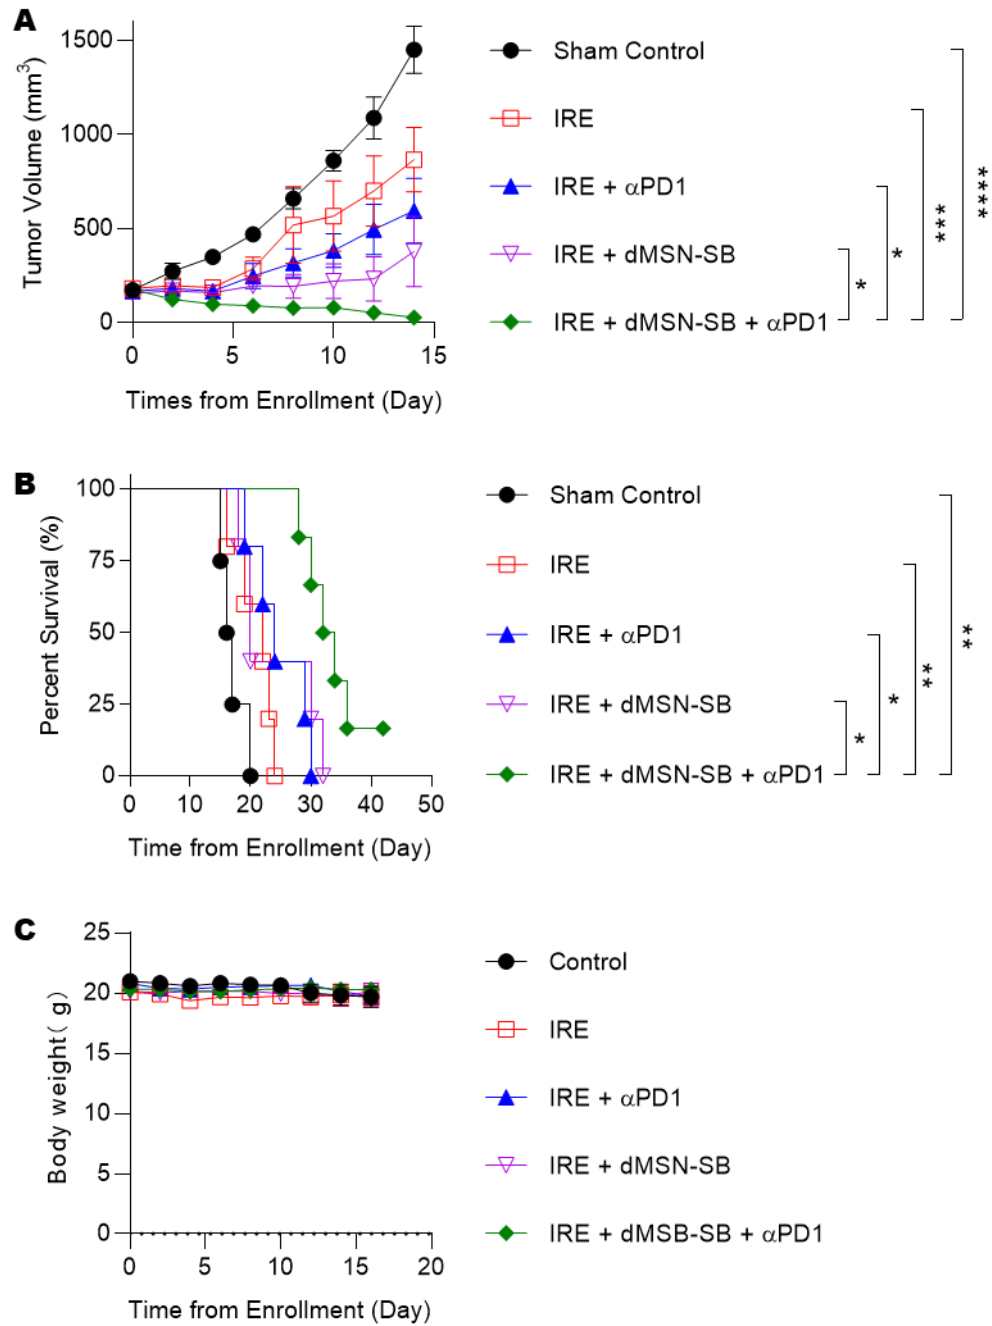

**Figure S16.** Anti-tumor efficacy in murine 4T1 orthotopic breast tumor model. A) Tumor growth curves to 15 days after start of treatments. B) Kaplan-Meier survival cures. C) Changes of body weight during treatment.

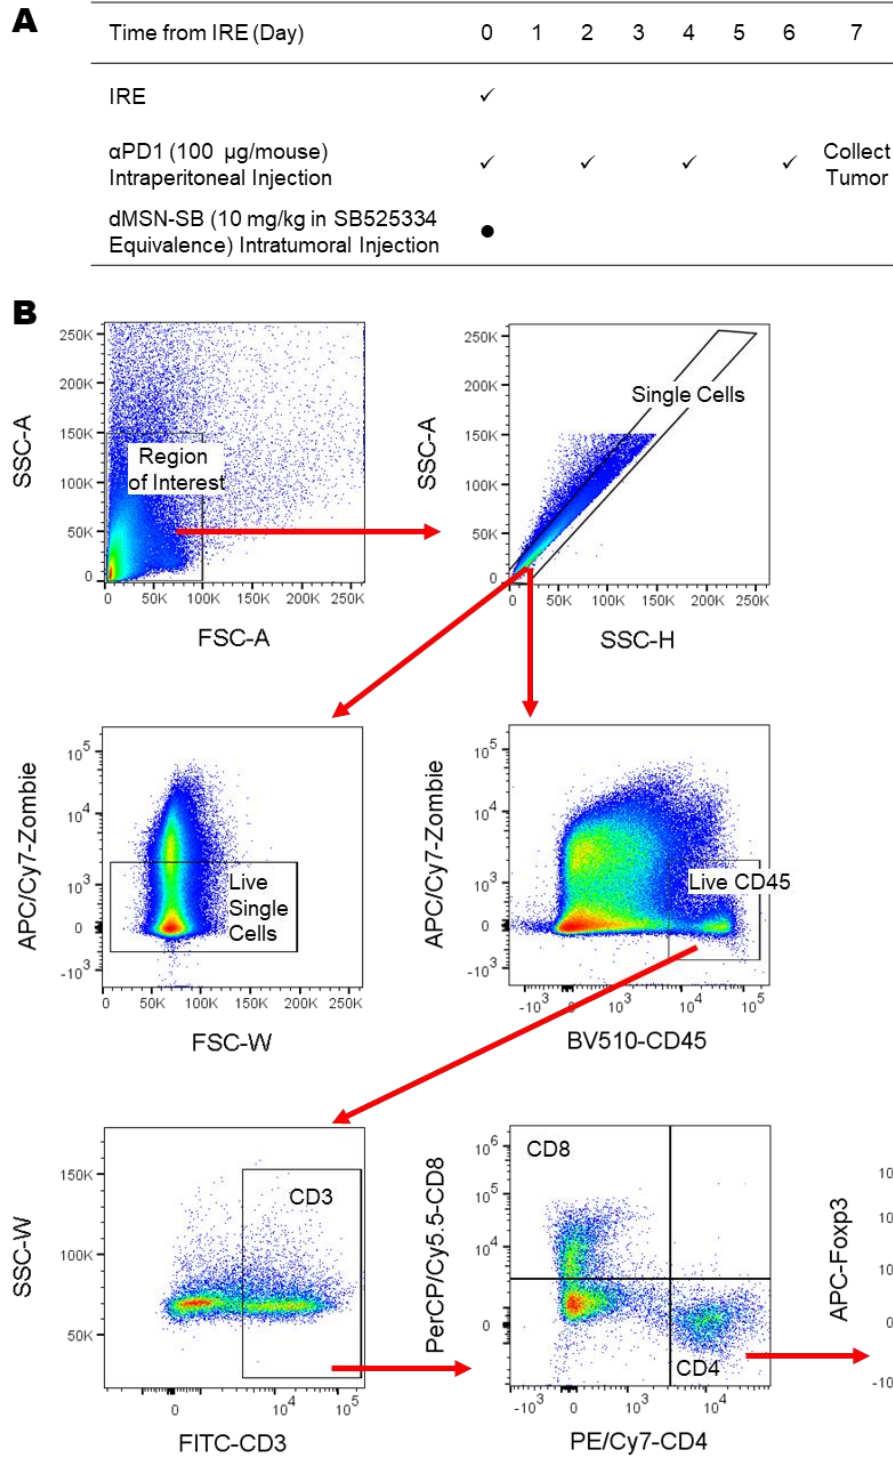

**Figure S17.** Gating strategy for intratumoral T cell flowcytometry. A) Schedule for treatment and tumor collection. B) Gating strategy for T cells.

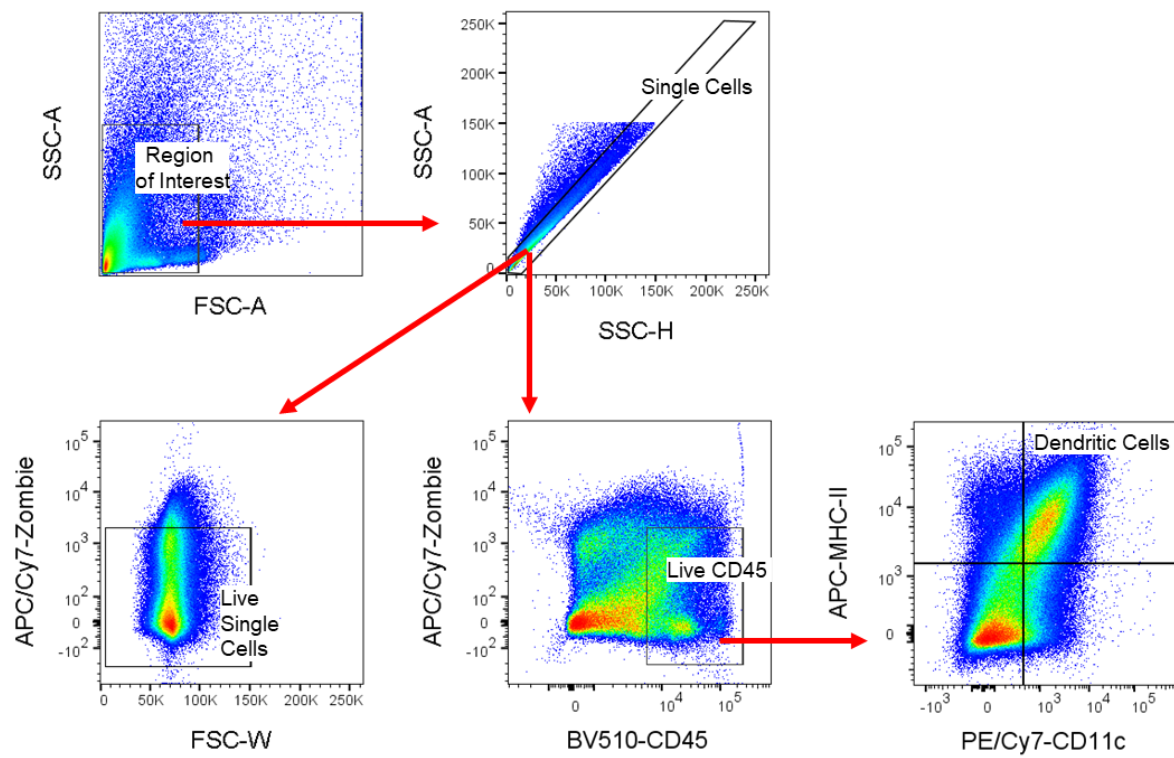

**Figure S18.** Gating Strategy for intratumoral dendritic cells

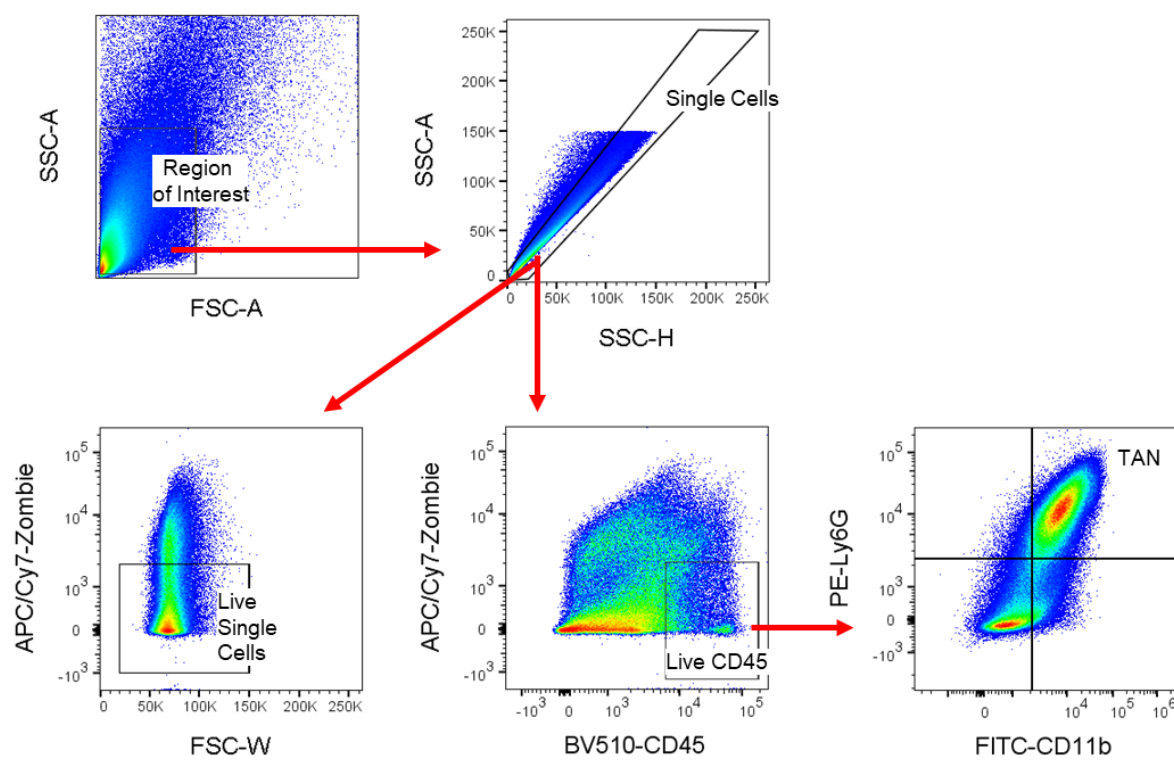

**Figure S19.** Gating Strategy for TANs

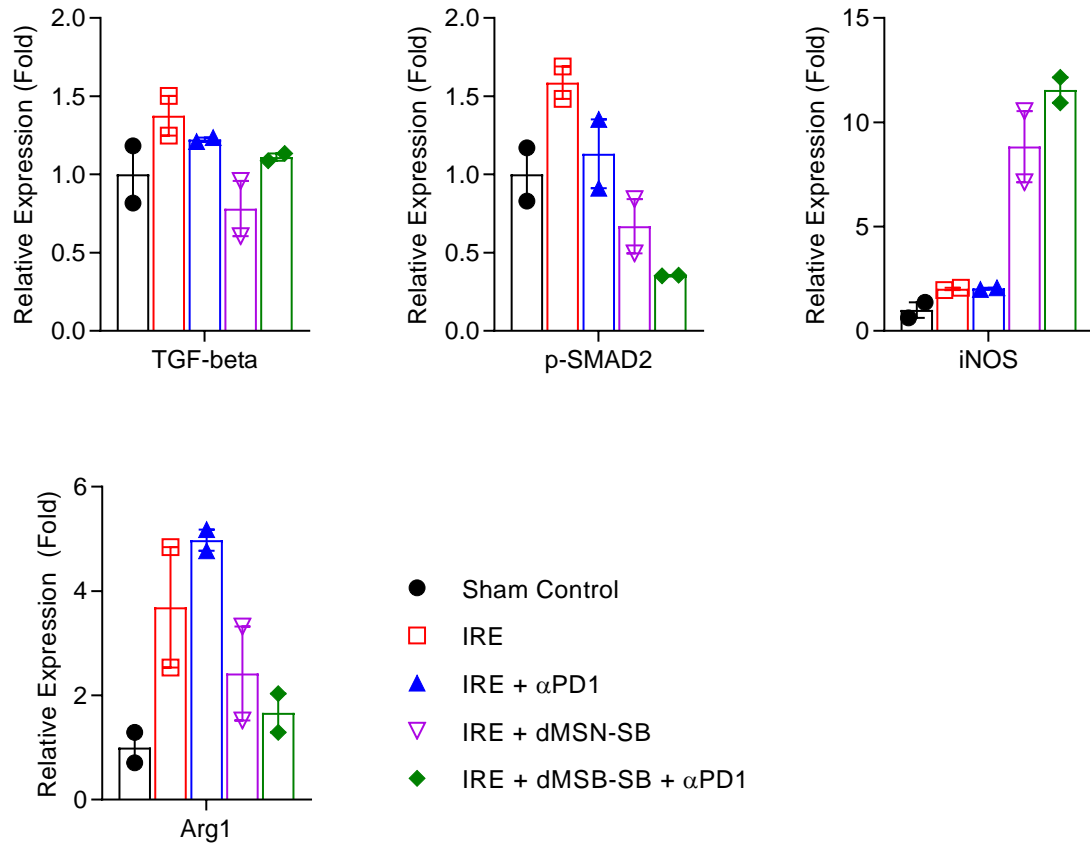

**Figure S20.** Quantification of Immunoblots in Figure 6A. Signal intensity from each band was integrated and normalized to those of  $\beta$ -actin in sham control.

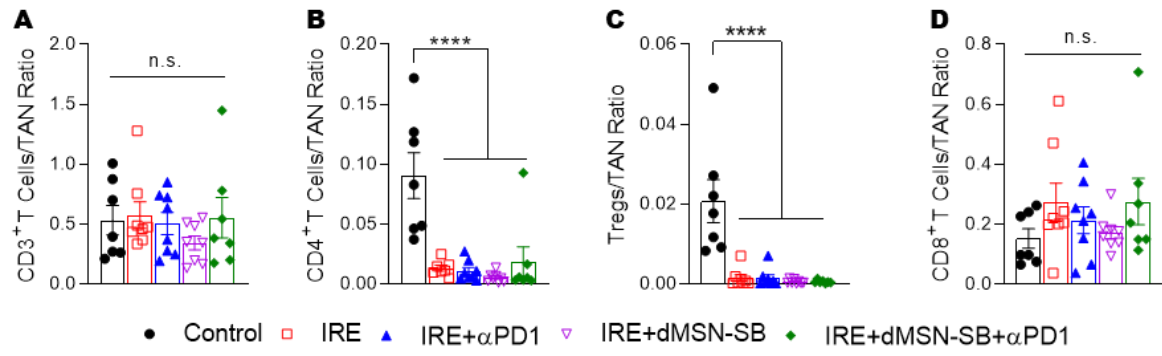

**Figure S21.** Relative abundance of T cell subpopulations to that of TAN. Significance of differences was determined using one-way ANOVA followed by Tukey post-hoc analysis. \*\*\*\*p < 0.0001,

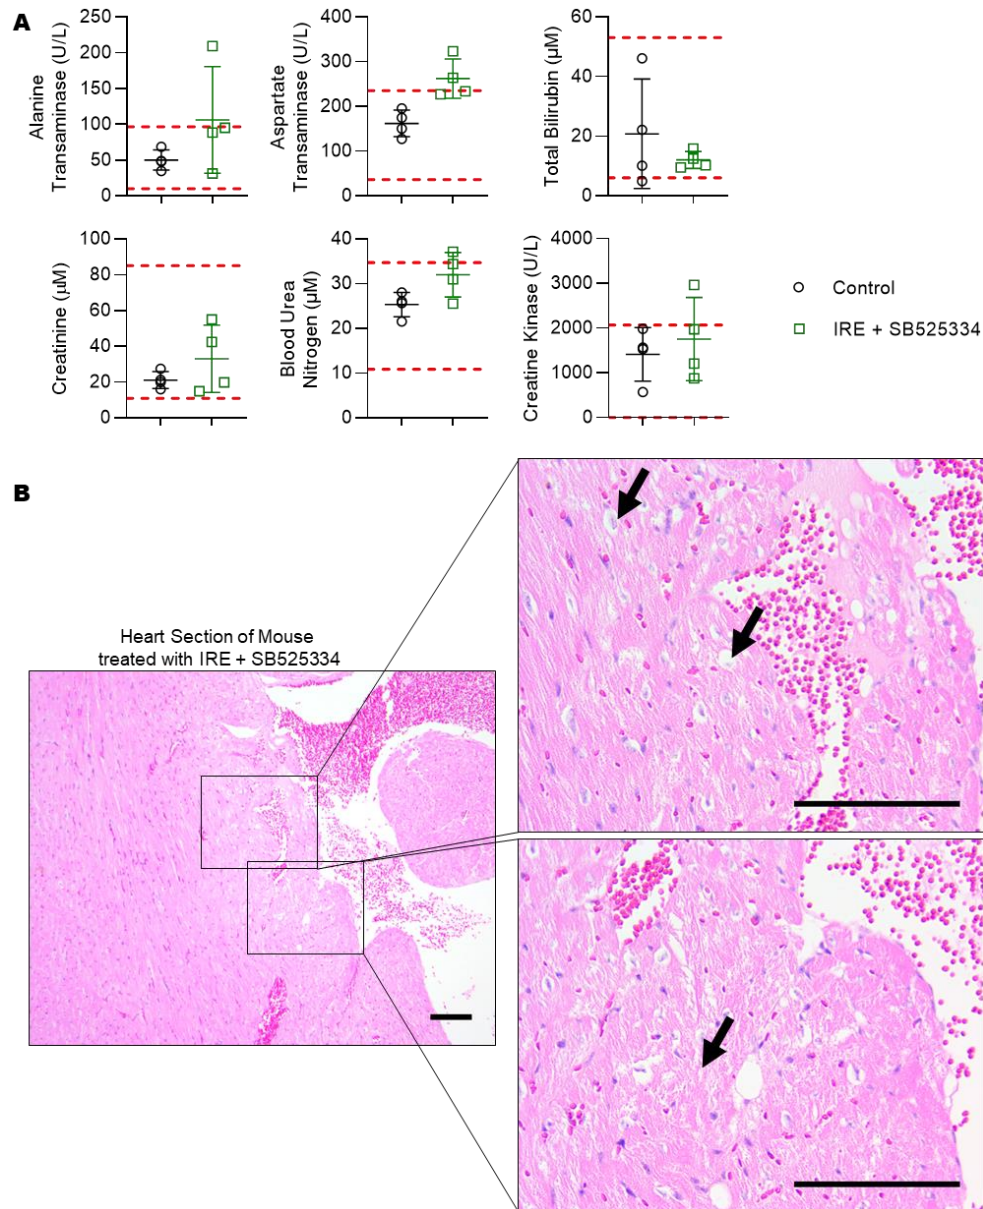

**Figure S22.** Toxicology studies on Panc02-bearing mice treated with IRE + SB525334. A) Blood chemistry analyses of liver, kidney, and heart toxicity in mice of sham control ( $n = 4$ ) or IRE + SB525334 group ( $n = 4$ ). The upper and lower limits of normal ranges are marked with red dashed lines. B) H&E staining of heart section in one mouse that showed abnormal blood chemistry results after IRE + SB525334 treatment. Regions of hydropic degeneration, fatty degeneration, and myolysis were observed (black arrows). Scale bar = 100 μm. Mice were treated with IRE on day 0, and administered with SB525334 at 10 mg kg<sup>-1</sup> per dose via oral gavage on days -1, 1, 3, 5, 7, and 9. Blood and tissue samples were collected on day 10 and then analyzed. Four mice were included in each group. Untreated mice were used as control.

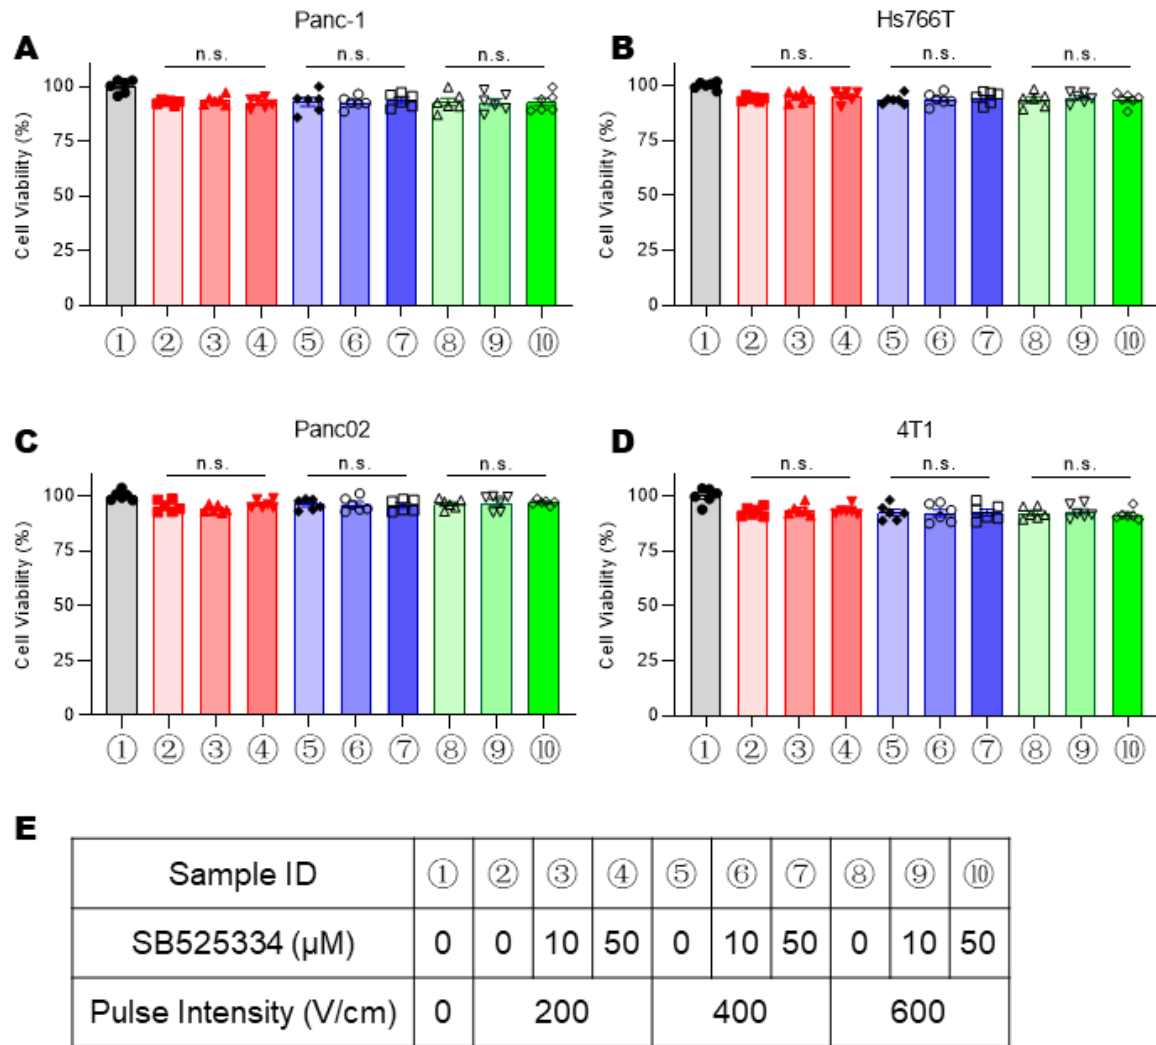

**Figure S23.** Cell viability after treatment with reversible electroporation and/or SB525334. A&B) human pancreatic cancer cell lines Panc-1 and Hs766T; C) murine pancreatic cancer cell line Panc02; D) murine breast cancer cell line 4T1. E) Layout of samples and corresponding experimental conditions. Electroporation parameters: gap between electrodes: 4 mm; pulse duration: 100  $\mu\text{s}$ ; interval between pulses: 1 s; number of pulses: 20; pulse voltage: 80, 160, and 120 V. Panc-1 cells were suspended at  $2.0 \times 10^6/\text{mL}$  in complete medium, and subjected to electroporation in a cuvette. The cells were then seeded at  $1.0 \times 10^4/\text{well}$  in a 96-well plate with SB525334 in complete medium, and cultured for 24 h. Cell viability was measured via CCK-8 assay. Six replicates were included in each group. Data was presented as mean  $\pm$  SEM. Statistical significance was determined using one-way ANOVA.

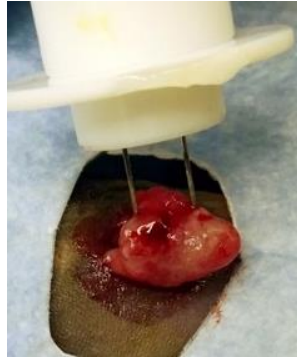

**Figure S24.** Photograph of IRE-treatment on orthotopic pancreatic tumor model.

**Table S1.** Gene ontology analysis based on 11 upregulated cytokines in Figure 7D

| Analysis Type: PANTHER Overrepresentation Test (Released 20210224)   |                 |             |          |
|----------------------------------------------------------------------|-----------------|-------------|----------|
| Annotation Version and Release Date:                                 |                 |             |          |
| GO Ontology database DOI: 10.5281/zenodo.5228828 Released 2021-08-18 |                 |             |          |
| Analyzed List: upload_1 (Mus musculus)                               |                 |             |          |
| Reference List: Mus musculus (all genes in database)                 |                 |             |          |
| Test Type: FISHER                                                    |                 |             |          |
| Correction: FDR                                                      |                 |             |          |
| GO Biological Process                                                | Fold Enrichment | Raw P-Value | FDR      |
| leukocyte migration (GO:0050900)                                     | 81.77           | 6.62E-17    | 1.04E-12 |
| leukocyte chemotaxis (GO:0030595)                                    | > 100           | 4.76E-16    | 3.75E-12 |
| cytokine-mediated signaling pathway (GO:0019221)                     | 59.18           | 1.14E-15    | 6.00E-12 |
| cell chemotaxis (GO:0060326)                                         | 76.51           | 1.27E-14    | 4.99E-11 |
| inflammatory response (GO:0006954)                                   | 38.28           | 5.40E-14    | 1.70E-10 |
| neutrophil chemotaxis (GO:0030593)                                   | > 100           | 9.39E-13    | 2.11E-09 |
| positive regulation of immune system process (GO:0002684)            | 18.54           | 8.85E-13    | 2.32E-09 |
| granulocyte chemotaxis (GO:0071621)                                  | > 100           | 1.57E-12    | 2.74E-09 |
| cellular response to cytokine stimulus (GO:0071345)                  | 26.34           | 1.49E-12    | 2.93E-09 |
| neutrophil migration (GO:1990266)                                    | > 100           | 2.35E-12    | 3.70E-09 |
| positive regulation of response to external stimulus (GO:0032103)    | 37.54           | 3.37E-12    | 4.83E-09 |
| granulocyte migration (GO:0097530)                                   | > 100           | 4.64E-12    | 6.09E-09 |
| response to cytokine (GO:0034097)                                    | 22.95           | 5.07E-12    | 6.14E-09 |
| chemotaxis (GO:0006935)                                              | 31.98           | 1.19E-11    | 1.34E-08 |
| taxis (GO:0042330)                                                   | 31.67           | 1.29E-11    | 1.35E-08 |
| response to external biotic stimulus (GO:0043207)                    | 13.52           | 2.01E-11    | 1.59E-08 |
| response to other organism (GO:0051707)                              | 13.54           | 1.99E-11    | 1.65E-08 |
| cell migration (GO:0016477)                                          | 20.01           | 1.71E-11    | 1.68E-08 |
| myeloid leukocyte migration (GO:0097529)                             | 94.44           | 1.96E-11    | 1.72E-08 |
| defense response (GO:0006952)                                        | 13.62           | 1.88E-11    | 1.74E-08 |
| leukocyte migration (GO:0050900)                                     | 81.77           | 6.62E-17    | 1.04E-12 |

<sup>1</sup>Top 30 enriched biological processes are listed

**Table S2.** Primer sequences

| Murine                     |         |                         |                            |
|----------------------------|---------|-------------------------|----------------------------|
| Target                     |         | Sequence (5' to 3')     | References                 |
| <i>Ccl3</i>                | Forward | TTCTCTGTACCATGACACTCTGC | PrimerBank ID<br>6755432a1 |
|                            | Reverse | CGTGGAATCTTCCGGCTGTAG   |                            |
| <i>Cxcl9</i>               | Forward | AACCTCCCACGTAGCTTTTCG   | NM_008599.4                |
|                            | Reverse | GCCAATGCCTGGTGTGTAAAC   |                            |
| <i>Fas</i>                 | Forward | TATCAAGGAGGCCCATTTTGC   | XM_030250751.2             |
|                            | Reverse | TGTTTCCACTTCTAAACCATGCT |                            |
| <i>Icam1</i>               | Forward | CTGCAGACAGTGACCATC      | NM_008625.2                |
|                            | Reverse | GTCCAGTTTCCCGGACAA      |                            |
| <i>Ifng</i>                | Forward | ATGAACGCTACACACTGCATC   | NM_008337.4                |
|                            | Reverse | CCATCCTTTTGCCAGTTCCTC   |                            |
| <i>Nos2</i>                | Forward | GTTCTCAGCCCAACAATACAAGA | PrimerBank ID<br>6754872a1 |
|                            | Reverse | GTGGACGGGTTCGATGTCAC    |                            |
| <i>Arg1</i>                | Forward | CTCCAAGCCAAAGTCCTTAGAG  | PrimerBank ID<br>7103255a1 |
|                            | Reverse | AGGAGCTGTCATTAGGGACATC  |                            |
| <i>Ccl17</i>               | Forward | AATGTAGGCCGAGAGTGCTG    | NM_011332.3                |
|                            | Reverse | TGCCCTGGACAGTCAGAAAC    |                            |
| <i>Ccl2</i>                | Forward | CAGATGCAGTTAACGCCCA     | NM_011333.3                |
|                            | Reverse | TGAGCTTGGTGACAAAACTACAG |                            |
| <i>Ccl5</i>                | Forward | TGCTGCTTTGCCTACCTCTC    | NM_013653.3                |
|                            | Reverse | TCCTTCGAGTGACAAACACGA   |                            |
| <i>Cd206</i>               | Forward | GATCCTCAACCCAAGGGCTC    | NM_008625.2                |
|                            | Reverse | ACCAATGCAACCCAGTGCTA    |                            |
| <i>Cxcl10</i>              | Forward | CCAAGTGCTGCCGTCATTTTC   | NM_021274.2                |
|                            | Reverse | GGCTCGCAGGGATGATTTCAA   |                            |
| <i>Cxcr2</i>               | Forward | GCTCACAAACAGCGTCGTAG    | NM_009909.3                |
|                            | Reverse | CCATGCTGATGCAGGCTAGT    |                            |
| <i>Il10</i>                | Forward | AGCCTTATCGGAAATGATCCAGT | NM_010548.2                |
|                            | Reverse | GGCCTTG TAGACACCTTGGT   |                            |
| <i>Mmp9</i>                | Forward | GCAGAGGCATACTTGTACCG    | NM_013599.5                |
|                            | Reverse | CGTCGTCGAAATGGGCATCT    |                            |
| <i>Neutrophil Elastase</i> | Forward | CATCTGCTTCGGGGACTCTG    | NM_015779.2                |
|                            | Reverse | CCCTCTCGGTCTTTGGGATG    |                            |
| <i>Prtn3</i>               | Forward | CACCTTCCTATGCCGGGAAC    | NM_011178.2                |
|                            | Reverse | CCGCAGCACGTTTTGAATCC    |                            |
| <i>Tgfb1</i>               | Forward | CTCCCGTGGCTTCTAGTGC     | PrimerBank ID<br>6755775a1 |
|                            | Reverse | GCCTTAGTTTGACAGGATCTG   |                            |
| <i>Tnfa</i>                | Forward | GACGTGGAAGTGGCAGAAGAG   | NM_001278601.1             |
|                            | Reverse | TTGGTGGTTTGTGAGTGTGAG   |                            |
| <i>Vegf</i>                | Forward | GCACATAGAGAGAATGAGCTTCC | PrimerBank ID              |

|            |         |                        |             |
|------------|---------|------------------------|-------------|
|            | Reverse | CTCCGCTCTGAACAAGGCT    | 6678563a1   |
| <i>Yml</i> | Forward | TTTGGACCTGCCCCGTTC     | NM_009892.3 |
|            | Reverse | CCTTGGAATGTCTTTCTCCACA |             |

<sup>1</sup>Primers are selected from PrimerBank or designed with Primers 3.0.

**Table S3.** List of antibodies used for flowcytometry

| Antibody                   | Manufacturer | Clone       | Catalogue Number |
|----------------------------|--------------|-------------|------------------|
| CD11b-FITC                 | Biolegend    | M1/70       | 101205           |
| CD11c-PE/Cyanine7          | Biolegend    | N418        | 117317           |
| CD19-Brilliant Violet 421  | Biolegend    | 6D5         | 115537           |
| CD206-Alexa Fluor647       | Biolegend    | C068C2      | 141711           |
| CD25-Brilliant Violet 421  | Biolegend    | PC61        | 102043           |
| CD3ε-FITC                  | Biolegend    | 145-2C11    | 100305           |
| CD44-PE                    | Biolegend    | IM7         | 103007           |
| CD45-Brilliant Violet 510  | Biolegend    | 30-F11      | 103138           |
| CD4-PE/Cyanine7            | Biolegend    | GK1.5       | 100421           |
| CD54-PE/Cyanine7           | Biolegend    | YN1/1.7.4   | 116121           |
| CD62L-APC                  | Biolegend    | MEL-14      | 104411           |
| CD80-PerCP/Cyanine5.5      | Biolegend    | 16-10A1     | 104721           |
| CD86-PE                    | Biolegend    | A17199A     | 159203           |
| CD8a-PerCP                 | Biolegend    | 53-6.7      | 100731           |
| CD95-PerCP/Cyanine5.5      | Biolegend    | SA367HB     | 152609           |
| F4/80-PE                   | Biolegend    | BM8         | 123109           |
| FOXP3-Alexa Fluor 647      | Biolegend    | MF-14       | 126407           |
| I-A/I-E-APC                | Biolegend    | M5/114.15.2 | 107613           |
| Ly6C- Brilliant Violet 421 | Biolegend    | HK1.4       | 128031           |
| Ly6G/Ly6C-PerCP            | Biolegend    | RB6-8C5     | 108425           |
| NK1.1-PE                   | Biolegend    | PK136       | 108707           |

**Table S4.** List of antibodies used for immunoblotting

| Antibody | Manufacturer | Catalogue Number | LOT        |
|----------|--------------|------------------|------------|
| β-actin  | Abclonal     | AC006            | 9100006002 |

|                              |                |           |      |
|------------------------------|----------------|-----------|------|
| iNOS                         | Absin          | abs130136 | MF12 |
| p-Erk 1/2<br>(Thr202/Tyr204) | Absin          | abs130614 | SD09 |
| p-PI3K (Tyr607)              | Absin          | abs130868 | JB11 |
| p-P38 (Thr180/Tyr182)        | Absin          | abs131122 | AI08 |
| TGF- $\beta$                 | Cell signaling | 3711S     | 7    |
| Arginase-1                   | Cell signaling | 936681    | 1    |
| p-Smad2                      | Cell signaling | 3108T     | 8    |

**Table S5.** Target list of mouse cytokine array

|   | 1, 2        | 3, 4       | 5, 6          | 7, 8       | 9, 10 | 11,12 | 13, 14    | 15, 16        | 17, 18       | 19, 20       | 21, 22 | 23, 24      |
|---|-------------|------------|---------------|------------|-------|-------|-----------|---------------|--------------|--------------|--------|-------------|
| A | Contro<br>1 |            |               |            |       |       |           |               |              |              |        | Contro<br>1 |
| B | CXCL<br>13  | C5a        | G-CSF         | GM-C<br>SF | CCL1  | CCL11 | ICAM<br>1 | IFN- $\gamma$ | IL1 $\alpha$ | IL-1 $\beta$ | IL1-ra | IL-2        |
| C | IL-3        | IL-4       | IL-5          | IL-6       | IL-7  | IL-10 | IL-13     | IL-12p<br>70  | IL-16        | IL-17        | IL-23  | IL-27       |
| D | CXCL<br>10  | CXCL<br>11 | CXCL<br>1     | M-CS<br>F  | CCL2  | CCL12 | CXCL<br>9 | CCL3          | CCL4         | MIP-2        | CCL5   | CXCL<br>12  |
| E | CCL17       | TIMP-<br>1 | TNF- $\alpha$ | TREM<br>-1 |       |       |           |               |              |              |        |             |
| F | Contro<br>1 |            |               |            |       |       |           |               |              |              |        |             |

**Table S6.** List of antibodies used for immunohistochemical staining

| Antibody | Manufacturer | Catalogue Number | LOT        |
|----------|--------------|------------------|------------|
| Ki67     | Servicebio   | GB111499         | LS203021   |
| MPO      | Servicebio   | GB11224          | AC2104004E |
| Ly-6G    | Servicebio   | GB11229          | AC2103022C |
